# Supplementary material for: Comparison of Immunogenicity and Reactogenicity of Five Primary Series of COVID-19 Vaccine Regimens against Circulating SARS-CoV-2 Variants of Concern among Healthy Thai Populations
Source: MDPI journal article supplement (doi:10.3390/vaccines11030564), 2023-03-01
Supplement: s1 [file s1]

**Supplementary Table S1. The proportion of seropositive participants based on anti-SARS-CoV-2 receptor-binding domain immunoglobulin G against wild-type SARS-CoV-2 following a primary series of COVID-19 vaccination, stratified by the COVID-19 vaccine regimen.**

| Study participant and study visit           | CoronaVac/CoronaVac                   |                                                   |                       | AZD1222/AZD1222                       |                                                   |                       | CoronaVac/AZD1222                     |                                                   |                       | AZD1222/BNT162b2                      |                                                   |                       | BNT162b2/BNT162b2                     |                                                   |                       |
|---------------------------------------------|---------------------------------------|---------------------------------------------------|-----------------------|---------------------------------------|---------------------------------------------------|-----------------------|---------------------------------------|---------------------------------------------------|-----------------------|---------------------------------------|---------------------------------------------------|-----------------------|---------------------------------------|---------------------------------------------------|-----------------------|
|                                             | Seropositive participants<br>(n/N, %) | Proportion difference <sup>a</sup><br>(%, 95% CI) | <i>P</i> <sup>a</sup> | Seropositive participants<br>(n/N, %) | Proportion difference <sup>a</sup><br>(%, 95% CI) | <i>P</i> <sup>a</sup> | Seropositive participants<br>(n/N, %) | Proportion difference <sup>a</sup><br>(%, 95% CI) | <i>P</i> <sup>a</sup> | Seropositive participants<br>(n/N, %) | Proportion difference <sup>a</sup><br>(%, 95% CI) | <i>P</i> <sup>a</sup> | Seropositive participants<br>(n/N, %) | Proportion difference <sup>a</sup><br>(%, 95% CI) | <i>P</i> <sup>a</sup> |
| <b><i>All participants</i></b>              |                                       |                                                   |                       |                                       |                                                   |                       |                                       |                                                   |                       |                                       |                                                   |                       |                                       |                                                   |                       |
| Pre-prime visit                             | 2/332<br>(0.6)                        |                                                   |                       | 5/221<br>(2.3)                        |                                                   |                       | 1/110<br>(0.9)                        |                                                   |                       | 1/128<br>(0.8)                        |                                                   |                       | 2/110<br>(1.8)                        |                                                   |                       |
| Post-prime visit                            | 199/332<br>(59.9)                     | 59.3<br>(53.8-64.9)                               | <0.001                | 207/216<br>(95.8)                     | 93.5<br>(89.8-97.3)                               | <0.001                | 58/109<br>(53.2)                      | 52.3<br>(42.0-63.6)                               | <0.001                | 119/124<br>(96.0)                     | 95.2<br>(90.6- 99.7)                              | <0.001                | 108/108<br>(100)                      | 98.2<br>(94.7-101.6)                              | <0.001                |
| Post-boost visit                            | 330/332<br>(99.4)                     | 39.5<br>(33.9-45.0)                               | <0.001                | 213/215<br>(99.1)                     | 3.3<br>(0.1-6.5)                                  | 0.02                  | 106/106<br>(100)                      | 46.8<br>(36.7-57.6)                               | <0.001                | 120/120<br>(100)                      | 4.0<br>(-0.2 to 8.6)                              | 0.03                  | 94/94<br>(100)                        | 0.0                                               | NA                    |
| <b><i>Adults aged &lt; 60 years old</i></b> |                                       |                                                   |                       |                                       |                                                   |                       |                                       |                                                   |                       |                                       |                                                   |                       |                                       |                                                   |                       |
| Pre-prime visit                             | 2/332<br>(0.6)                        |                                                   |                       | 4/73<br>(5.5)                         |                                                   |                       | 0/55<br>(0)                           |                                                   |                       | 1/73<br>(1.4)                         |                                                   |                       | 2/110<br>(1.8)                        |                                                   |                       |
| Post-prime visit                            | 199/332<br>(59.9)                     | 59.3<br>(53.8-64.9)                               | <0.001                | 69/72<br>(95.8)                       | 90.3<br>(82.0-98.5)                               | <0.001                | 36/54<br>(66.7)                       | 66.7<br>(52.2- 81.1)                              | <0.001                | 73/73<br>(100)                        | 98.6<br>(94.6-102.7)                              | <0.001                | 108/108<br>(100)                      | 98.2<br>(94.7-101.6)                              | <0.001                |
| Post-boost visit                            | 330/332<br>(99.4)                     | 39.5<br>(33.9-45.0)                               | <0.001                | 72/72<br>(100)                        | 4.2<br>(-1.9 to 10.3)                             | 0.08                  | 53/53<br>(100)                        | 33.3<br>(19.3-48.6)                               | <0.001                | 73/73<br>(100)                        | 0.0                                               | NA                    | 94/94<br>(100)                        | 0.0                                               | NA                    |
| <b><i>Elderly aged ≥ 60 years old</i></b>   |                                       |                                                   |                       |                                       |                                                   |                       |                                       |                                                   |                       |                                       |                                                   |                       |                                       |                                                   |                       |
| Pre-prime visit                             | -                                     | -                                                 | -                     | 1/148<br>(0.7)                        |                                                   |                       | 1/55<br>(1.8)                         |                                                   |                       | 0/55<br>(0.0)                         |                                                   |                       | -                                     | -                                                 | -                     |
| Post-prime visit                            | -                                     | -                                                 | -                     | 138/144<br>(95.8)                     | 95.1<br>(90.9-99.3)                               | <0.001                | 22/55<br>(40.0)                       | 38.2<br>(23.5-52.8)                               | <0.001                | 46/51<br>(90.2)                       | 90.2<br>(80.1-100.3)                              | <0.001                | -                                     | -                                                 | -                     |
| Post-boost visit                            | -                                     | -                                                 | -                     | 141/143<br>(98.6)                     | 2.8<br>(-1.2 to 6.9)                              | 0.10                  | 53/53<br>(100)                        | 60.0<br>(45.3-75.4)                               | <0.001                | 47/47<br>(100)                        | 10.8<br>(-0.3 to 22.0)                            | 0.03                  | -                                     | -                                                 | -                     |

Abbreviations: AZD1222 vaccine, the Oxford-AstraZeneca COVID-19 vaccine; BNT162b2, Pfizer-BioNTech vaccine; COVID-19, coronavirus disease 2019; NA, not applicable; SARS-CoV-2, severe acute respiratory syndrome coronavirus-2; 95% CI, 95% confidence interval.

<sup>a</sup>The McNemar’s test was performed to compare the proportions of seropositive participants, based on anti-SARS-CoV-2 receptor-binding domain immunoglobulin G, between the indicated visit and the previous visit within each COVID-19 vaccine regimen.

**Supplementary Table S2. The proportion of participants with positive neutralizing activity against wild-type SARS-CoV-2 following a primary series of COVID-19 vaccination, stratified by the COVID-19 vaccine regimen.**

| Study participant and study visit    | CoronaVac/CoronaVac                   |                                                   |                       | AZD1222/AZD1222                       |                                                   |                       | CoronaVac/AZD1222                     |                                                   |                       | AZD1222/BNT162b2                      |                                                   |                       | BNT162b2/BNT162b2                     |                                                   |                       |
|--------------------------------------|---------------------------------------|---------------------------------------------------|-----------------------|---------------------------------------|---------------------------------------------------|-----------------------|---------------------------------------|---------------------------------------------------|-----------------------|---------------------------------------|---------------------------------------------------|-----------------------|---------------------------------------|---------------------------------------------------|-----------------------|
|                                      | Seropositive participants<br>(n/N, %) | Proportion difference <sup>a</sup><br>(%, 95% CI) | <i>P</i> <sup>a</sup> | Seropositive participants<br>(n/N, %) | Proportion difference <sup>a</sup><br>(%, 95% CI) | <i>P</i> <sup>a</sup> | Seropositive participants<br>(n/N, %) | Proportion difference <sup>a</sup><br>(%, 95% CI) | <i>P</i> <sup>a</sup> | Seropositive participants<br>(n/N, %) | Proportion difference <sup>a</sup><br>(%, 95% CI) | <i>P</i> <sup>a</sup> | Seropositive participants<br>(n/N, %) | Proportion difference <sup>a</sup><br>(%, 95% CI) | <i>P</i> <sup>a</sup> |
| <b>All participants</b>              |                                       |                                                   |                       |                                       |                                                   |                       |                                       |                                                   |                       |                                       |                                                   |                       |                                       |                                                   |                       |
| Pre-prime visit                      | 0/332<br>(0)                          |                                                   |                       | 0/221<br>(0)                          |                                                   |                       | 0/110<br>(0)                          |                                                   |                       | 0/128<br>(0)                          |                                                   |                       | 0/110<br>(0)                          |                                                   |                       |
| Post-prime visit                     | 4/332<br>(1.2)                        | 1.2<br>(-0.3 to 2.7)                              | 0.05                  | 113/216<br>(52.3)                     | 52.3<br>(45.2-59.4)                               | <0.001                | 2/109<br>(1.8)                        | 1.8<br>(-1.6 to 5.3)                              | 0.16                  | 66/124<br>(53.2)                      | 53.2<br>(43.6-62.8)                               | <0.001                | 87/108<br>(80.6)                      | 80.6<br>(72.2-88.9)                               | <0.001                |
| Post-boost visit                     | 275/332<br>(82.8)                     | 81.6<br>(77.2-86.1)                               | <0.001                | 189/215<br>(87.9)                     | 35.6<br>(28.8-43.0)                               | <0.001                | 103/106<br>(97.2)*                    | 95.4<br>(90.3-100.2)                              | <0.001                | 119/120<br>(99.2)*                    | 46.0<br>(34.8-54.3)                               | <0.001                | 94/94<br>(100)*                       | 19.4<br>(11.9-30.6)                               | <0.001                |
| <b>Adults aged &lt; 60 years old</b> |                                       |                                                   |                       |                                       |                                                   |                       |                                       |                                                   |                       |                                       |                                                   |                       |                                       |                                                   |                       |
| Pre-prime visit                      | 0/332<br>(0)                          |                                                   |                       | 0/73<br>(0)                           |                                                   |                       | 0/55<br>(0)                           |                                                   |                       | 0/73<br>(0)                           |                                                   |                       | 0/110<br>(0)                          |                                                   |                       |
| Post-prime visit                     | 4/332<br>(1.2)                        | 1.2<br>(-0.3 to 2.7)                              | 0.05                  | 41/72<br>(56.9)                       | 56.9<br>(44.1-69.8)                               | <0.001                | 2/54<br>(3.7)                         | 3.7<br>(-3.2 to 10.6)                             | 0.16                  | 49/73<br>(67.1)                       | 67.1<br>(55.0-79.3)                               |                       | 87/108<br>(80.6)                      | 80.6<br>(72.2-88.9)                               | <0.001                |
| Post-boost visit                     | 275/332<br>(82.8)                     | 81.6<br>(77.2-86.1)                               | <0.001                | 69/72<br>(95.8)*                      | 38.9<br>(24.7-51.4)                               | <0.001                | 51/53<br>(96.2)*                      | 92.5<br>(83.5-1.01)                               | <0.001                | 73/73<br>(100)*                       | 32.9<br>(20.7-45.0)                               |                       | 94/94<br>(100)*                       | 19.4<br>(11.9-30.6)                               | <0.001                |
| <b>Elderly aged ≥ 60 years old</b>   |                                       |                                                   |                       |                                       |                                                   |                       |                                       |                                                   |                       |                                       |                                                   |                       |                                       |                                                   |                       |
| Pre-prime visit                      | -                                     | -                                                 | -                     | 0/148<br>(0)                          |                                                   |                       | 0/55<br>(0)                           |                                                   |                       | 0/55<br>(0)                           |                                                   |                       | -                                     | -                                                 | -                     |
| Post-prime visit                     | -                                     | -                                                 | -                     | 72/144<br>(50.0)                      | 50.0<br>(41.1-58.9)                               | <0.001                | 0/55<br>(0)                           | 0.0                                               | NA                    | 17/51<br>(33.3)                       | 33.3<br>(18.4-48.2)                               |                       | -                                     | -                                                 | -                     |
| Post-boost visit                     | -                                     | -                                                 | -                     | 120/143<br>(83.9)                     | 33.9<br>(24.4-43.7)                               | <0.001                | 52/53<br>(98.1) <sup>†</sup>          | 98.1<br>(92.6-103.7)                              | <0.001                | 46/47<br>(97.9) <sup>†</sup>          | 64.6<br>(46.9-79.2)                               | <0.001                | -                                     | -                                                 | -                     |

Abbreviations: AZD1222 vaccine, the Oxford-AstraZeneca COVID-19 vaccine; BNT162b2, Pfizer-BioNTech vaccine; COVID-19, coronavirus disease 2019; SARS-CoV-2, severe acute respiratory syndrome coronavirus-2; 95% CI, 95% confidence interval.

<sup>a</sup>The McNemar's test was performed to compare the proportions of participants with positive neutralizing activity against wild-type SARS-CoV-2 between the indicated visit and the previous visit within each COVID-19 vaccine regimen.

\*Indicates a significant difference ( $P < 0.01$ ) of the proportion of participants with detectable neutralizing activity against wild-type SARS-CoV-2 after the completion of a primary series of an indicated COVID-19 vaccination compared with the homologous CoronaVac vaccine regimen, evaluated by the Chi-squared test.

<sup>†</sup>Indicates a significant difference ( $P < 0.01$ ) of the proportion of participants with detectable neutralizing activity against wild-type SARS-CoV-2 after the completion of a primary series of an indicated COVID-19 vaccination compared with the homologous AZD1222 vaccine regimen, evaluated by the Chi-squared test.

Supplementary Table S3. The proportion of participants with positive neutralizing activity, based on the in-house surrogate virus neutralization test, against wild-type and other circulating variants of concern of SARS-CoV-2 following the completion of a primary series of COVID-19 vaccination, stratified by the COVID-19 vaccine regimen.

| Study participant and SARS-CoV-2 variant | CoronaVac/CoronaVac                |                                        |                       | AZD1222/AZD1222                    |                                        |                       | CoronaVac/AZD1222                  |                                        |                       | AZD1222/BNT162b2                   |                                        |                       | BNT162b2/BNT162b2                  |                                        |                       |
|------------------------------------------|------------------------------------|----------------------------------------|-----------------------|------------------------------------|----------------------------------------|-----------------------|------------------------------------|----------------------------------------|-----------------------|------------------------------------|----------------------------------------|-----------------------|------------------------------------|----------------------------------------|-----------------------|
|                                          | Seropositive participants (n/N, %) | Proportion difference <sup>a</sup> (%) | <i>P</i> <sup>a</sup> | Seropositive participants (n/N, %) | Proportion difference <sup>a</sup> (%) | <i>P</i> <sup>a</sup> | Seropositive participants (n/N, %) | Proportion difference <sup>a</sup> (%) | <i>P</i> <sup>a</sup> | Seropositive participants (n/N, %) | Proportion difference <sup>a</sup> (%) | <i>P</i> <sup>a</sup> | Seropositive participants (n/N, %) | Proportion difference <sup>a</sup> (%) | <i>P</i> <sup>a</sup> |
| <b>All participants</b>                  |                                    |                                        |                       |                                    |                                        |                       |                                    |                                        |                       |                                    |                                        |                       |                                    |                                        |                       |
| Wild-type                                | 91/92 (98.9)                       | Ref                                    | Ref                   | 107/120 (89.2)*                    | Ref                                    | Ref                   | 102/106 (96.2)                     | Ref                                    | Ref                   | 104/107 (97.2)                     | Ref                                    | Ref                   | 94/94 (100)                        | Ref                                    | Ref                   |
| Alpha                                    | 62/92 (67.4)                       | -31.5 (-42.1 to -20.9)                 | <0.001                | 82/120 (68.3)                      | -20.9 (-28.9 to -12.7)                 | <0.001                | 73/106 (68.9)                      | -27.3 (-36.8 to -17.9)                 | <0.001                | 103/107 (96.3)*                    | -0.9 (-3.7 to 1.8)                     | 0.32                  | 94/94 (100)*                       | 0                                      | NA                    |
| Beta                                     | 71/92 (77.2)                       | -21.7 (-31.3 to -12.2)                 | <0.001                | 58/120 (48.3)*                     | -40.9 (-50.5 to -31.2)                 | <0.001                | 69/106 (65.1)                      | -31.1 (-40.9 to -21.4)                 | <0.001                | 104/107 (97.2)*                    | 0                                      | NA                    | 94/94 (100)*                       | 0                                      | NA                    |
| Delta                                    | 89/92 (96.7)                       | -2.2 (-6.2 to 1.9)                     | 0.16                  | 90/120 (75.0)*                     | -14.2 (-21.2 to -7.1)                  | <0.001                | 96/106 (90.6)                      | -5.6 (-11.0 to -0.3)                   | 0.01                  | 104/107 (97.2)                     | 0                                      | NA                    | 94/94 (100)                        | 0                                      | NA                    |
| Omicron                                  | -                                  | -                                      | -                     | 32/120 (26.7)                      | -62.5 (-72.0 to -53.0)                 | <0.001                | 19/106 (17.9)                      | -78.3 (-87.1 to -69.5)                 | <0.001                | 45/107 (42.1) <sup>†</sup>         | -55.1 (-65.5 to -44.8)                 | <0.001                | 8/94 (8.5) <sup>†</sup>            | -91.5 (-98.2 to -84.8)                 | <0.001                |
| <b>Adults aged &lt; 60 years old</b>     |                                    |                                        |                       |                                    |                                        |                       |                                    |                                        |                       |                                    |                                        |                       |                                    |                                        |                       |
| Wild-type                                | 91/92 (98.9)                       | Ref                                    | Ref                   | 57/59 (96.6)                       | Ref                                    | Ref                   | 50/53 (94.3)                       | Ref                                    | Ref                   | 58/60 (96.7)                       | Ref                                    | Ref                   | 94/94 (100)                        | Ref                                    | Ref                   |
| Alpha                                    | 62/92 (67.4)                       | -31.5 (-42.1 to -20.9)                 | <0.001                | 43/59 (72.9)                       | -23.7 (-36.3 to -11.2)                 | <0.001                | 40/53 (75.5)                       | -18.8 (-31.3 to -6.4)                  | 0.002                 | 58/60 (96.7)*                      | 0                                      | NA                    | 94/94 (100)*                       | 0                                      | NA                    |
| Beta                                     | 71/92 (77.2)                       | -21.7 (-31.3 to -12.2)                 | <0.001                | 39/59 (66.1)                       | -30.5 (-44.0 to -17.1)                 | <0.001                | 39/53 (73.6)                       | -20.7 (-33.6 to -7.9)                  | 0.001                 | 58/60 (96.7)*                      | 0                                      | NA                    | 94/94 (100)*                       | 0                                      | NA                    |
| Delta                                    | 89/92 (96.7)                       | -2.2 (-6.2 to 1.9)                     | 0.16                  | 47/59 (79.7)*                      | -16.9 (-28.2 to -5.7)                  | 0.002                 | 48/53 (90.6)                       | -3.7 (-10.8 to 3.2)                    | 0.16                  | 58/60 (96.7)                       | 0                                      | NA                    | 94/94 (100)                        | 0                                      | NA                    |
| Omicron                                  | -                                  | -                                      | -                     | 16/59 (27.1)                       | -69.5 (-82.9 to -56.0)                 | <0.001                | 10/53 (18.9)                       | -75.4 (-88.9 to -62.0)                 | <0.001                | 43/60 (71.7) <sup>†</sup>          | -25.0 (-37.6 to -12.4)                 | <0.001                | 8/94 (8.5) <sup>†</sup>            | -91.5 (-98.2 to -84.8)                 | <0.001                |
| <b>Elderly aged ≥ 60 years old</b>       |                                    |                                        |                       |                                    |                                        |                       |                                    |                                        |                       |                                    |                                        |                       |                                    |                                        |                       |
| Wild-type                                | -                                  | -                                      | -                     | 50/61 (82.0)                       | Ref                                    | Ref                   | 52/53 (98.1) <sup>†</sup>          | Ref                                    | Ref                   | 46/47 (97.9) <sup>†</sup>          | Ref                                    | Ref                   | -                                  | -                                      | -                     |
| Alpha                                    | -                                  | -                                      | -                     | 39/61 (63.9)                       | -18.1 (-29.3 to -6.7)                  | 0.001                 | 33/53 (62.3)                       | -35.8 (-50.6 to -21.1)                 | <0.001                | 45/47 (95.7) <sup>†</sup>          | -2.2 (-8.4 to 4.1)                     | 0.32                  | -                                  | -                                      | -                     |
| Beta                                     | -                                  | -                                      | -                     | 19/61 (31.1)                       | -50.9 (-65.0 to -36.6)                 | <0.001                | 30/53 (56.6) <sup>†</sup>          | -41.5 (-56.7 to -26.4)                 | <0.001                | 46/47 (97.9) <sup>†</sup>          | 0                                      | NA                    | -                                  | -                                      | -                     |
| Delta                                    | -                                  | -                                      | -                     | 43/61 (70.5)                       | -11.5 (-21.1 to -1.8)                  | 0.008                 | 48/53 (90.6) <sup>†</sup>          | -7.5 (-16.5 to 1.5)                    | 0.04                  | 46/47 (97.9) <sup>†</sup>          | 0                                      | NA                    | -                                  | -                                      | -                     |
| Omicron                                  | -                                  | -                                      | -                     | 16/61 (26.2)                       | -55.8 (-69.8 to -41.6)                 | <0.001                | 9/53 (17.0)                        | -81.1 (-93.6 to -68.7)                 | <0.001                | 2/47 (4.3) <sup>†</sup>            | -93.6 (-102.7 to -84.5)                | <0.001                | -                                  | -                                      | -                     |

Abbreviations: AZD1222 vaccine, the Oxford-AstraZeneca COVID-19 vaccine; BNT162b2, Pfizer-BioNTech vaccine; COVID-19, coronavirus disease 2019; NA, not applicable; SARS-CoV-2, severe acute respiratory syndrome coronavirus-2.

<sup>a</sup>The McNemar's test was performed to compare the proportions of participants with positive neutralizing activity, based on the in-house surrogate virus neutralization test, between the wild-type SARS-CoV-2 and the indicated variant of concern within each COVID-19 vaccine regimen.

\*Indicates a significant difference ( $P < 0.01$ ) of the proportion of participants with positive neutralizing activity, based on the in-house surrogate virus neutralization test, against wild-type and other circulating variants of concern of SARS-CoV-2 after the completion of a primary series of an indicated COVID-19 vaccination compared with the homologous CoronaVac vaccine regimen, evaluated by the Chi-squared test.

<sup>†</sup>Indicates a significant difference ( $P < 0.01$ ) of the proportion of participants with positive neutralizing activity, based on the in-house surrogate virus neutralization test, against wild-type and other circulating variants of concern of SARS-CoV-2 after the completion of a primary series of an indicated COVID-19 vaccination compared with the homologous AZD1222 vaccine regimen, evaluated by the Chi-squared test.
